# Supplementary figures and images for: Mediterranean Diet and Cardiovascular Prevention: Why Analytical Observational Designs Do Support Causality and Not Only Associations
Source: MDPI journal article supplement (doi:10.3390/ijerph192013653), 2022-10-21

# Subgroup Analysis

High(>6) vs Low(<3) adherence to MedDiet

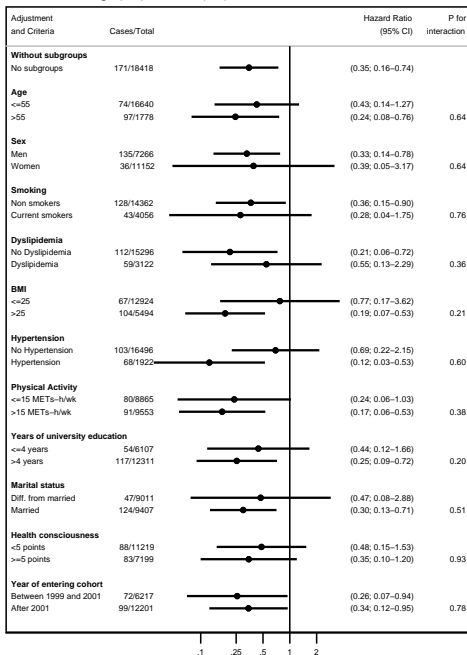

Supplement: s1 [file s1]
